# Supplementary material for: Molecularly barcoded Zika virus libraries to probe in vivo evolutionary dynamics
Source: PubMed Central journal article supplement (PMC5891079; doi:10.1371/journal.ppat.1006964), 2018-03-28

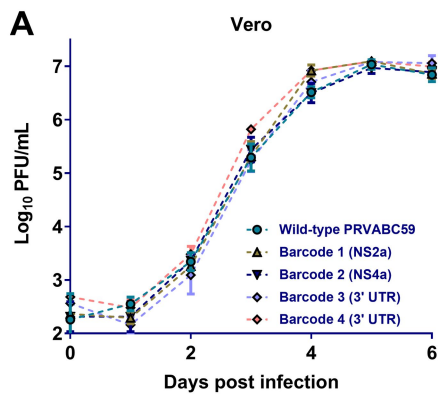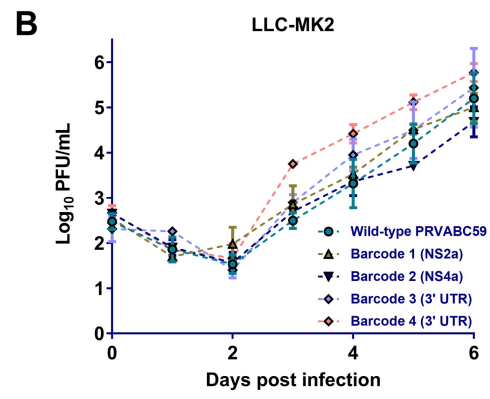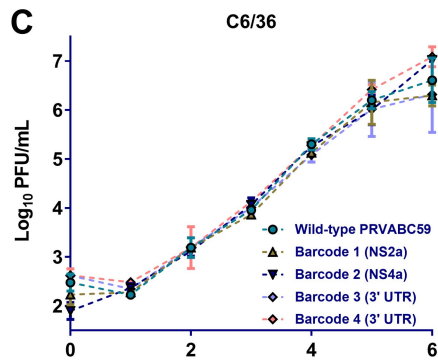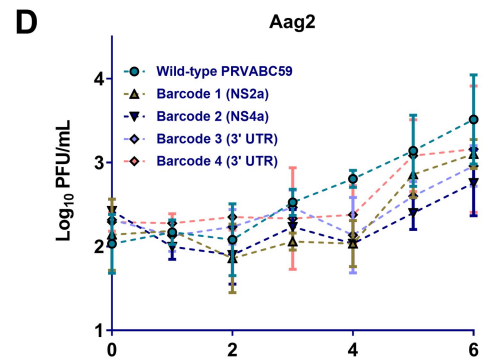

Supplement: ppat.1006964.s004.pdf [file ppat.1006964.s004.pdf]
